# Supplementary material
Source: MDPI journal article supplement (https://www.mdpi.com/1999-4907/14/12/2435)
Supplement: s1 [file s1]

## Supplementary Materials

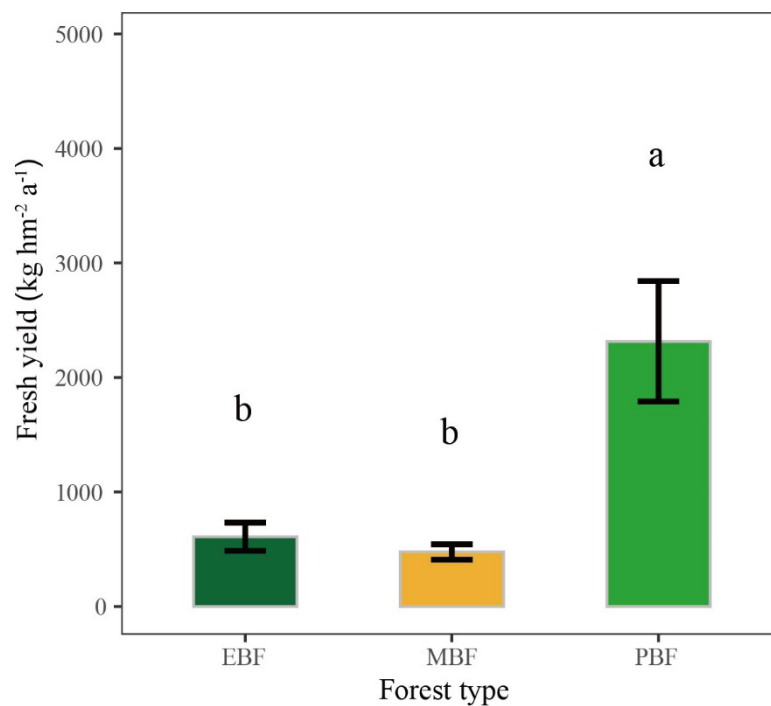

**Figure S1.** Fresh yields of bamboo shoots without sheaths in different bamboo forest types. Different lowercase letters indicate significant differences between different bamboo forest types ( $p < 0.05$ ).

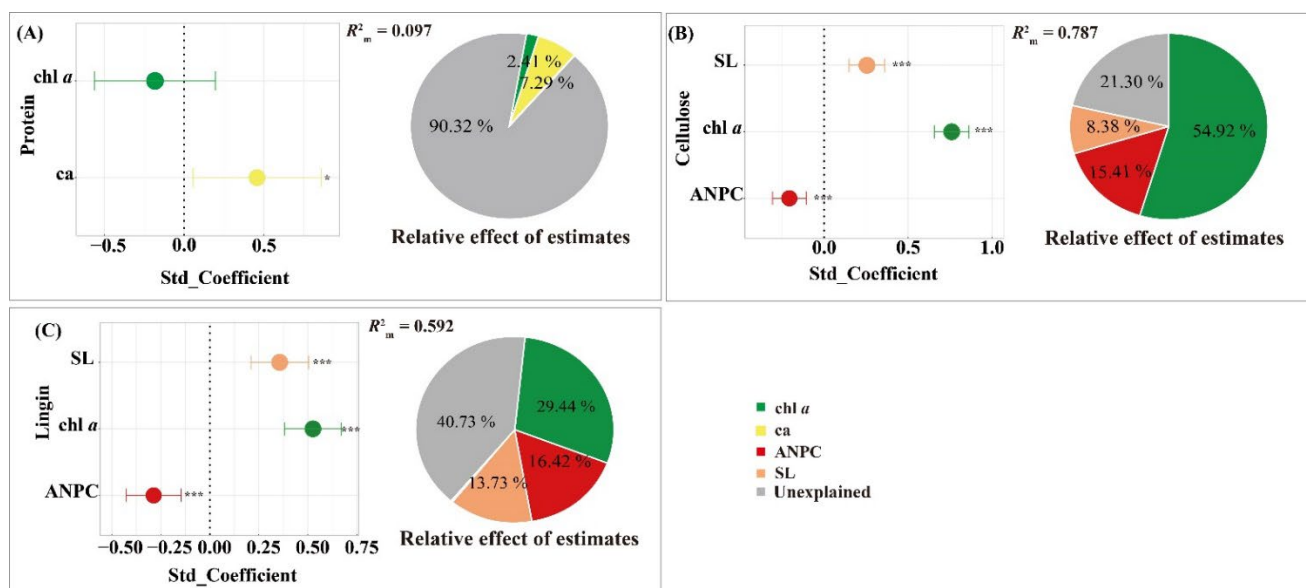

**Figure S2.** The linear mixed effect model of the effects of related factors on the nutritional (A: protein content) and taste quality (B: cellulose content; C: lignin content) of bamboo shoots (\* for  $p < 0.05$ , \*\*\* for  $p < 0.001$ ). Notes: chl a: chlorophyll a; ca: carotenoid; ANPC: parenchyma cell number in the axial system; SL: scattered light.

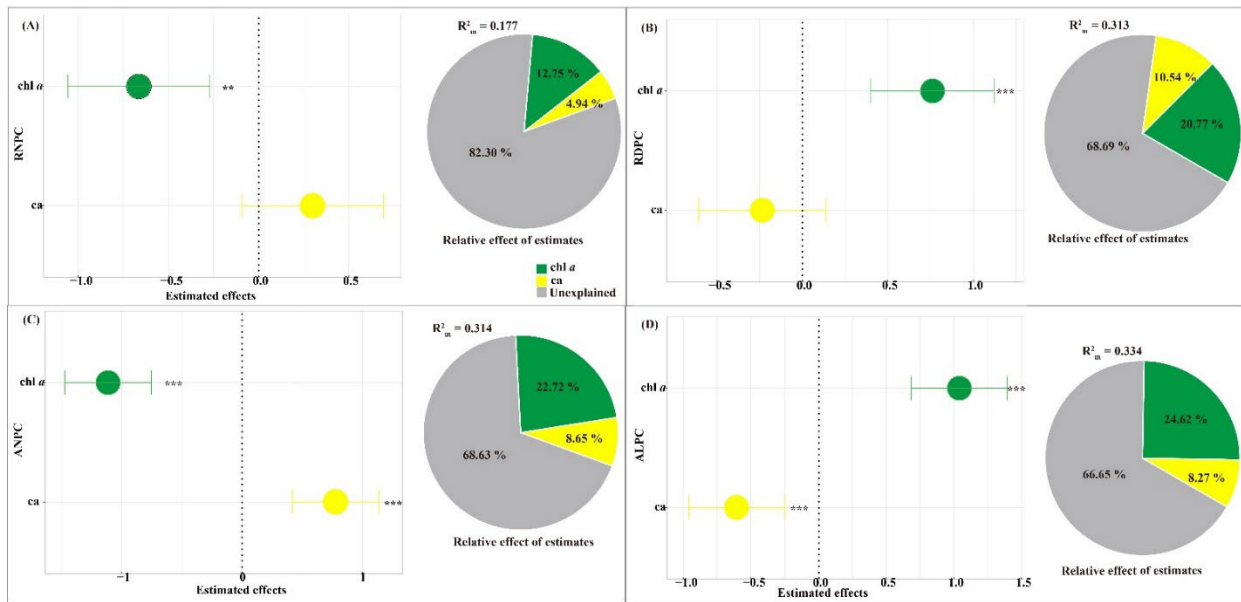

**Figure S3.** The linear mixed effect model of influencing factors and the parenchyma cell number in radial system (A), parenchyma cell diameter in radial system (B), parenchyma cell number in axial system (C) and parenchyma cell length in axial system (D) of bamboo shoots. (\*\* for  $p < 0.01$ , \*\*\* for  $p < 0.001$ ). Notes: chl *a*: chlorophyll *a*; ca: carotenoid.

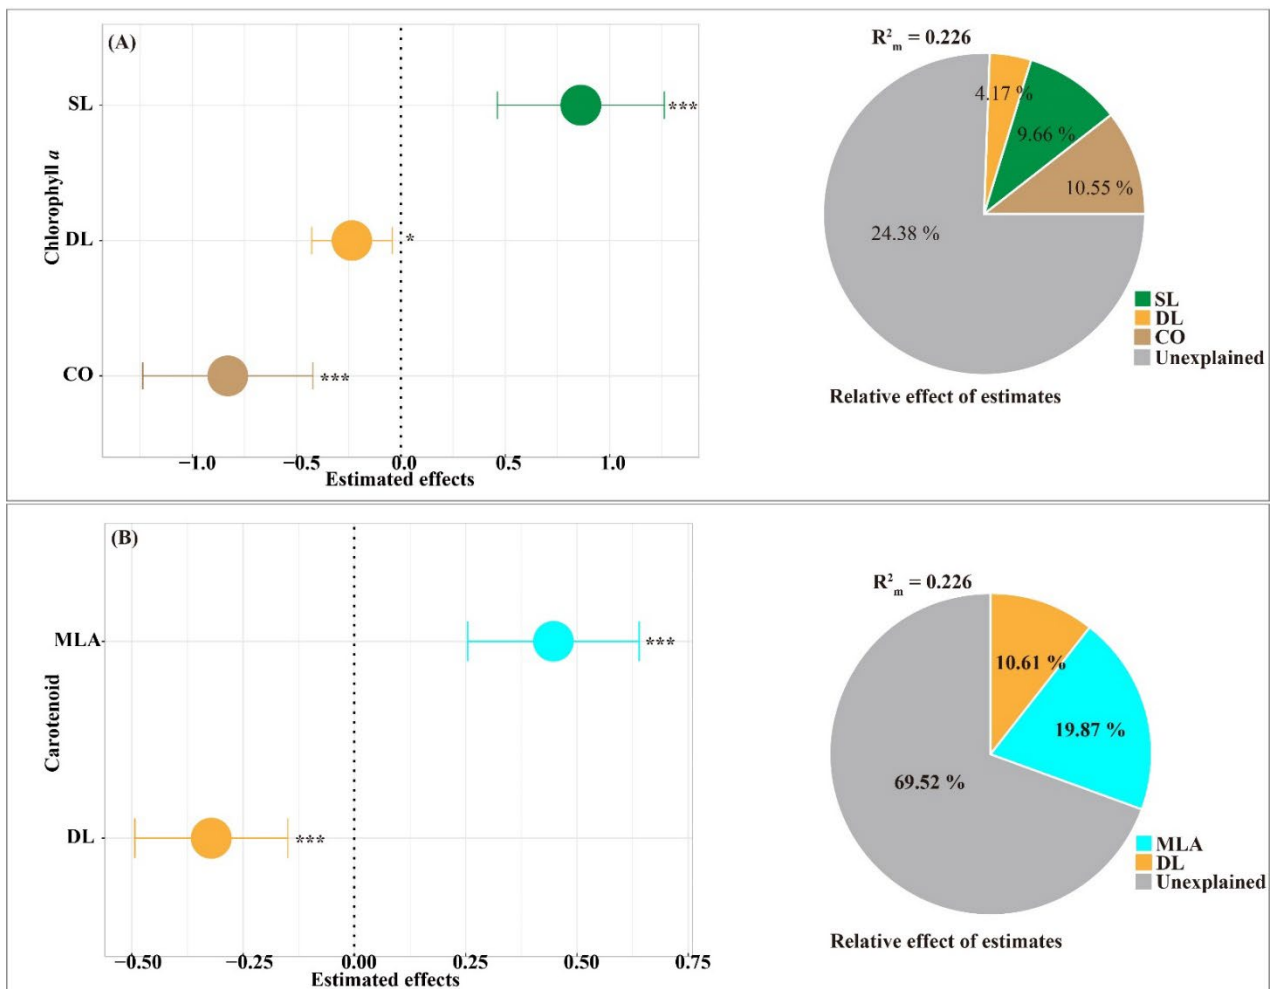

**Figure S4.** The line mixed effect model of influencing factors on chlorophyll *a* (A) and carotenoid (B) contents in bamboo shoots (\* for  $p < 0.05$ , \*\*\* for  $p < 0.001$ ). Notes: CO: canopy openness; MLA: mean leaf angle; DL: direct light; SL: scattered light.

**Table S1.** Coordinates, terrain and canopy trees characteristics of sample collection of bamboo shoots plots (means  $\pm$  SD).

| Sites |               | Coordinates  |              | Terrain   |        |                | Information on canopy tree species |                 |                   |                   |                               |
|-------|---------------|--------------|--------------|-----------|--------|----------------|------------------------------------|-----------------|-------------------|-------------------|-------------------------------|
| Plot  | Longitude (°) | Latitude (°) | Altitude (m) | Slope (°) | Aspect | Slope position | DBH (cm)                           | Height (cm)     | Crown width 1 (m) | Crown width 2 (m) | Dominant species              |
| E1    | 107.13708     | 29.02070     | 1359         | 15        | North  | Uphill         | 20.21 $\pm$ 9.32                   | 5.08 $\pm$ 1.60 | 2.31 $\pm$ 1.37   | 2.20 $\pm$ 1.10   | <i>Symplocos anomala</i>      |
| E2    | 107.13695     | 29.02036     | 1351         | 12        | North  | Uphill         | 16.29 $\pm$ 0.65                   | 3.30 $\pm$ 0.65 | 1.70 $\pm$ 0.84   | 1.20 $\pm$ 0.53   | <i>Symplocos anomala</i>      |
| E3    | 107.13695     | 29.02034     | 1353         | 20        | North  | Uphill         | 15.33 $\pm$ 3.55                   | 3.58 $\pm$ 0.74 | 1.61 $\pm$ 0.76   | 1.55 $\pm$ 0.51   | <i>Symplocos lancifolia</i>   |
| E4    | 107.13687     | 29.02025     | 1356         | 23        | North  | Uphill         | 16.14 $\pm$ 7.01                   | 3.43 $\pm$ 1.09 | 1.97 $\pm$ 1.04   | 1.87 $\pm$ 1.10   | <i>Symplocos anomala</i>      |
| E5    | 107.13679     | 29.02015     | 1367         | 22        | North  | Uphill         | 27.98 $\pm$ 9.63                   | 6.14 $\pm$ 2.20 | 3.06 $\pm$ 1.26   | 2.98 $\pm$ 1.81   | <i>Quercus myrsinifolia</i>   |
| M1    | 107.13748     | 29.02039     | 1347         | 13        | North  | Uphill         | 14.18 $\pm$ 1.94                   | 3.78 $\pm$ 0.26 | 1.38 $\pm$ 0.37   | 1.16 $\pm$ 0.39   | <i>Euscaphis japonica</i>     |
| M2    | 107.13750     | 29.02021     | 1342         | 17        | North  | Uphill         | 23.11 $\pm$ 13.27                  | 5.08 $\pm$ 1.14 | 1.63 $\pm$ 0.87   | 1.59 $\pm$ 0.75   | <i>Liquidambar formosana</i>  |
| M3    | 107.13721     | 29.02008     | 1350         | 23        | North  | Uphill         | 29.77 $\pm$ 12.11                  | 6.23 $\pm$ 2.25 | 1.87 $\pm$ 1.63   | 2.23 $\pm$ 1.88   | <i>Platycarya strobilacea</i> |
| M4    | 107.13729     | 29.02016     | 1353         | 23        | North  | Uphill         | 18.45 $\pm$ 6.19                   | 4.07 $\pm$ 0.91 | 1.63 $\pm$ 0.61   | 1.28 $\pm$ 0.53   | <i>Carpinus turczaninowii</i> |
| M5    | 107.13708     | 29.02027     | 1347         | 22        | North  | Uphill         | 17.33 $\pm$ 2.23                   | 3.85 $\pm$ 0.52 | 1.58 $\pm$ 0.87   | 1.42 $\pm$ 0.44   | <i>Carpinus turczaninowii</i> |
| P1    | 107.13624     | 29.02039     | 1355         | 10        | North  | Uphill         | 2.71 $\pm$ 0.19                    | 4.50 $\pm$ 0.34 | 0.66 $\pm$ 0.17   | 0.67 $\pm$ 0.10   | <i>Chimonobambusa utilis</i>  |
| P2    | 107.13635     | 29.02049     | 1355         | 10        | North  | Uphill         | 2.33 $\pm$ 0.31                    | 3.90 $\pm$ 0.84 | 0.61 $\pm$ 0.16   | 0.58 $\pm$ 0.15   | <i>Chimonobambusa utilis</i>  |
| P3    | 107.13614     | 29.02039     | 1357         | 10        | North  | Uphill         | 2.05 $\pm$ 0.41                    | 2.75 $\pm$ 0.64 | 0.71 $\pm$ 0.15   | 0.74 $\pm$ 0.09   | <i>Chimonobambusa utilis</i>  |
| P4    | 107.13686     | 29.01955     | 1355         | 12        | North  | Uphill         | 1.56 $\pm$ 0.27                    | 2.96 $\pm$ 0.61 | 0.57 $\pm$ 0.16   | 0.46 $\pm$ 0.20   | <i>Chimonobambusa utilis</i>  |
| P5    | 107.13687     | 29.01967     | 1353         | 18        | North  | Uphill         | 1.92 $\pm$ 0.42                    | 2.72 $\pm$ 0.47 | 0.59 $\pm$ 0.11   | 0.48 $\pm$ 0.06   | <i>Chimonobambusa utilis</i>  |
| P6    | 107.13682     | 29.01943     | 1349         | 17        | North  | Uphill         | 1.66 $\pm$ 0.20                    | 4.03 $\pm$ 0.76 | 0.75 $\pm$ 0.08   | 0.67 $\pm$ 0.07   | <i>Chimonobambusa utilis</i>  |
